# Supplementary material
Source: PubMed Central journal article supplement (PMC1976213)
Supplement: pnas_0706985104_2.pdf [file pnas_0706985104_2.pdf]

**Table 1. Oligonucleotides used to PCR-amplify Southern probe templates**

| Nucleosome position   | 5' Oligo | 3' Oligo |
|-----------------------|----------|----------|
| CEN3 -3 nucleosome    | SB1316   | SB1317   |
| CEN3 -2 nucleosome    | SB1325   | SB1326   |
| CEN3 -1 nucleosome    | SB1251   | SB1252   |
| CEN3 core nucleosome  | SB1253   | SB1254   |
| CEN3 +1 nucleosome    | SB1255   | SB1256   |
| CEN3 +2 nucleosome    | SB1336   | SB1337   |
| CEN3 +3 nucleosome    | SB1338   | SB1339   |
| CEN4 -1 nucleosome    | SB1328   | SB1329   |
| CEN4 core nucleosome  | SB1330   | SB1331   |
| CEN4 +1 nucleosome    | SB1493   | SB1494   |
| CEN6 -3 kb nucleosome | SB1476   | SB1477   |
| CEN6 +3 kb nucleosome | SB1478   | SB1479   |

Oligonucleotide sequences are available upon request.
