# Supplementary material
Source: PubMed Central journal article supplement (PMC1976213)

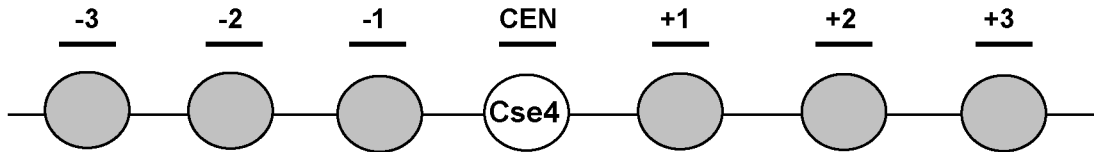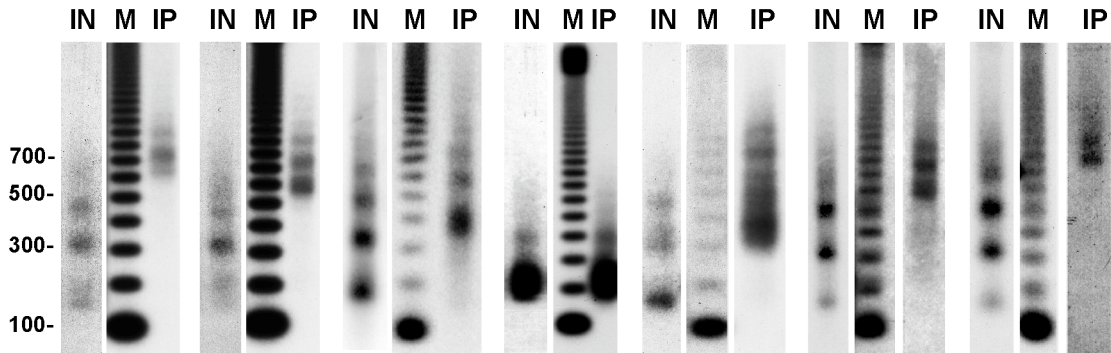

Supplement: pnas_0706985104_1.pdf [file pnas_0706985104_1.pdf]
